# Supplementary material for: Retention of indoxyl sulfate in different genotypes of ABCC2 may explain variation in tacrolimus pharmacokinetics
Source: PeerJ. 2024 Dec 18;12:e18729. doi: 10.7717/peerj.18729 (PMC11662891; doi:10.7717/peerj.18729)
Supplement: Supplemental Information 1 [file peerj-12-18729-s001.xlsx]

## Sheet: Sheet1
Group	Smoker	Diabetes	Hypertension	Age(years)	Gender	Height(cm)	Weight(kg)	BMI(kg/m2)	TAC Trough concentration (ng/mL)	TAC Dose(mg/day)	TAC Trough concentration (ng/mL)/TAC Dose(mg/day)	ALT(IU/L)	AST(IU/L)	TBIL(µmol/mL)	Albumin(µmol/mL)	Uric acid(µmol/L)	C-reactive protein(mg/L)	eGFR(mL/min/1.73m2)	Creatine(µmol/L)	Transplant date	Sampling date	Post-operative day	CYP3A4 inhibitor use	Pgp inhibtor use	CYP3A4 or Pgp inhibitor use	IS(µg/mL)	lnIS(µg/mL)	HA(µg/mL)	lnHA(µg/mL)	rs2032582(G/T/A)	rs1045642(C/T)	rs717620(C/T)	rs2273697(G/A)	rs3740066(T/C)
CKD	NO	NO	NO	71	FeMale	153	55	23.5	5.8	2	1.45	7.5	15.7	9.3	44.2	494	4.2	56.9	90	2018-09-14	2022-06-06	1361	No	No	No	2.13	0.756122	0.0632	-2.76145	GG	CC	TT	GG	TT
CKD	NO	NO	NO	73	FeMale	158	55	22	6.8	1.5	2.26667	16.1	18.8	5.7	42.6	457	2.6	83.9	64	2010-10-02	2022-06-07	4266	No	No	No	1.42	0.350657	4.21	1.43746	TG	TT	CC	AA	CC
CKD	NO	NO	NO	53	Male	176	80	25.8	5.7	2	1.425	19.3	24.2	19.2	46	347	3.1	84.6	87	2020-12-12	2022-06-07	542	No	No	No	0.359	-1.02443	0.357	-1.03002	AG	CC	CC	GG	CC
CKD	NO	NO	NO	63	FeMale	161	60	23.1	2.7	4	0.3375	7.1	14.7	24.1	41.3	355	3	74.2	73	2018-04-02	2022-06-07	1527	No	No	No	0.755	-0.281038	0.0816	-2.50593	GG	CC	CC	AA	CC
CKD	NO	NO	NO	66	Male	170	62	21.5	9.9	0.5	9.9	17.9	25.5	13.2	43.9	376	2.1	82	86	2020-04-11	2022-06-09	789	Yes	No	Yes	1.4	0.336472	0.136	-1.9951	TG	CC	CC	GG	CC
CKD	NO	YES	NO	55	Male	170	76	26.3	11.8	2	2.95	92.7	67.3	35	46.3	272	2	76.8	94	2018-03-05	2022-06-10	1558	No	No	No	0.493	-0.707246	3.21	1.16627	TG	TC	TC	GG	TC
CKD	NO	NO	NO	51	FeMale	160	41	16	6.8	0.5	6.8	15.6	22.7	20	42.3	360	2.6	78.7	72	2019-04-11	2022-06-13	1159	No	No	No	0.999	-0.001001	1.9	0.641854	TG	TC	TC	GG	TC
CKD	NO	NO	NO	43	Male	169	60	21	4.7	2	1.175	17.9	19.8	15.9	46.5	413	0.7	81.8	93	2020-02-26	2022-06-13	838	No	No	No	0.564	-0.572701	0.0429	-3.14888	TT	CC	TC	GG	CC
CKD	NO	NO	NO	64	FeMale	160	60	23.4	4.4	0.5	4.4	32.8	34	8.2	42.2	530	3.5	49.2	104	2010-05-12	2022-06-15	4417	No	No	No	2.67	0.982078	1.92	0.652325	AA	TT	TC	GG	TC
CKD	NO	NO	YES	64	Male	173	70	23.4	2.6	1	1.3	14.7	17	18.8	43.1	319	1.4	78.3	90	2015-04-17	2022-06-15	2616	No	No	No	1.19	0.173953	0.457	-0.783072	TG	TC	TC	GG	TC
CKD	NO	NO	NO	63	Male	167	60	21.5	5.9	2	1.475	10.7	18.3	12.9	45.2	577	2.4	71.2	98	2020-03-03	2022-06-15	834	No	No	No	1.6	0.470004	0.181	-1.70926	TG	TC	CC	GG	CC
CKD	NO	NO	NO	47	Male	170	45	15.6	4.5	1	2.25	7.6	13	69.6	44	563	2.3	29.6	221	2019-04-04	2022-06-16	1169	No	No	No	0.888	-0.118784	0.879	-0.12897	GG	CC	CC	GG	CC
CKD	NO	NO	NO	47	FeMale	162	42	16	4.6	2	1.15	9.9	17.5	7.9	38	499	3	53.6	102	2021-03-26	2022-06-16	447	No	No	No	0.723	-0.324346	0.0756	-2.5823	GG	CC	CC	GG	CC
CKD	NO	NO	NO	64	FeMale	159	50	19.8	8.1	1	4.05	13	17.2	8.3	72.9	323	2.6	54	96	2021-03-13	2022-06-16	460	No	No	No	0.668	-0.403467	0.479	-0.736055	TG	TC	CC	GG	CC
CKD	NO	NO	NO	48	FeMale	155	50	20.8	5.5	1	2.75	11.1	21.1	16.1	45.4	466	0.5	46.4	115	2018-12-02	2022-06-20	1296	No	No	No	0.214	-1.54178	0.238	-1.43548	AA	TT	CC	GG	CC
CKD	NO	NO	NO	52	FeMale	160	60	23.4	5.1	2	1.275	10.5	18.4	11.1	39.4	396	5	71.5	78	2017-04-19	2022-06-20	1888	No	No	No	0.331	-1.10564	0.157	-1.85151	TG	TC	CC	AG	CC
CKD	NO	NO	NO	56	Male	168	59	20.9	4.3	2.5	0.86	11.9	14.2	21.4	69.9	363	2.8	65.2	108	2020-03-21	2022-06-23	824	No	No	No	0.854	-0.157824	0.375	-0.980829	AA	TT	CC	GG	CC
CKD	NO	NO	NO	66	Male	174	55	18.2	6.5	2	1.625	6.7	24.7	24.7	42.3	437	1.6	85.5	83	2021-02-12	2022-07-05	508	No	No	No	0.923	-0.080126	0.122	-2.10373	TA	TC	TC	GG	TC
CKD	YES	NO	NO	40	Male	181	95	29	6.1	2	1.525	30.2	23.2	8.9	44.4	547	3.2	89.6	87	2019-12-27	2022-07-05	921	No	No	No	1.55	0.438255	0.0947	-2.35704	GG	CC	CC	AG	CC
CKD	NO	NO	YES	58	FeMale	163	66	24.8	5.6	3	0.933333	14.3	15.6	6	42.3	442	4.9	52.5	100	2018-06-05	2022-07-07	1493	No	No	No	1.03	0.029559	0.0546	-2.90772	TG	TC	CC	GG	CC
CKD	NO	YES	YES	53	Male	168	68	23.9	7.1	0.5	7.1	7.8	25.8	27.3	41.7	341	2.2	86.9	85	2018-04-13	2022-07-11	1550	No	No	No	0.319	-1.14256	0.216	-1.53248	GG	CC	CC	GG	CC
CKD	NO	YES	YES	68	Male	162	51	19.2	6.6	0.5	6.6	11.9	21.5	24.3	44.8	300	1.3	88.6	80	2018-06-21	2022-07-12	1482	No	No	No	0.592	-0.524249	0.127	-2.06357	TA	TC	CC	AG	CC
CKD	NO	NO	NO	65	FeMale	161	55	21.2	4.5	1	2.25	45.7	47.2	15.3	47.4	346	1.9	75	72	2018-10-20	2022-07-14	1363	No	No	No	0.602	-0.507498	1.79	0.582216	AA	TC	CC	GG	CC
CKD	NO	NO	NO	61	FeMale	155	49	20.4	7	2	1.75	14.1	21.1	11.1	45.7	256	2.8	65.4	82	2019-02-12	2022-07-18	1252	No	No	No	2.73	1.0043	0.165	-1.80181	TA	TC	TC	GG
CKD	NO	NO	NO	39	Male	175	76	24.8	8.6	2	2.15	17.4	25.6	14.4	44.5	367	4.6	49.6	146	2021-04-16	2022-07-20	460	No	No	No	0.841	-0.173164	0.219	-1.51868	TG	TC	CC	GG	CC
CKD	NO	NO	NO	35	FeMale	159	40	15.8	9.8	3	1.63333	30.8	44.4	15	41.1	588	1.6	36.2	151	2018-05-11	2022-07-22	1533	No	No	No	2.2	0.788457	0.0457	-3.08566	GG	CC	CC	GG	CC
CKD	NO	YES	YES	45	Male	170	77	26.6	8.2	2	2.05	16.2	24.6	12.5	48	370	0.3	65.4	112	2021-01-20	2022-07-23	549	No	No	No	1.6	0.470004	0.733	-0.31061	TT	TT	CC	GG	CC
CKD	NO	NO	NO	42	Male	168	60	21.3	5.5	2	1.375	65	42.6	25.7	46.1	444	2.3	67	111	2018-06-09	2022-07-23	1505	No	No	No	1.01	0.00995	1.53	0.425268	TG	TC	CC	GG	TC
CKD	NO	YES	NO	47	Male	169	53	18.6	6.6	0.5	6.6	8.9	16.1	11.5	46	443	0.9	71.5	100	2018-01-29	2022-07-25	1638	No	No	No	0.143	-1.94491	0.0391	-3.24163	TG	TC	CC	GG	CC
CKD	NO	NO	NO	54	Male	164	70	26	4.1	2	1.025	55.7	43.6	9.8	43.9	481	1.5	75.3	96	2019-03-04	2022-07-25	1239	No	No	No	3.14	1.14422	0.269	-1.31304	TA	TC	CC	GG	CC
CKD	NO	NO	YES	54	Male	166	48	17.4	5.1	1.5	1.7	16.3	17	13.3	48.2	423	1.2	41.7	160	2017-09-27	2022-07-25	1762	No	No	No	1.78	0.576613	0.19	-1.66073	GG	CC	TC	GG	TC
CKD	NO	YES	NO	52	Male	180	88	27.2	8.1	0.5	8.1	55.2	52.6	6	44.5	589	2.3	61	116	2021-06-19	2022-07-26	402	Yes	No	Yes	1.29	0.254642	0.134	-2.00992	TG	TC	CC	GG	CC
CKD	NO	NO	NO	60	Male	172	75	25.4	7.5	2	1.875	8.2	13.1	9.5	44.4	488	3.9	59.2	116	2021-02-20	2022-07-28	523	No	Yes	Yes	0.525	-0.644357	0.061	-2.79688	TG	TC	CC	GG	CC
CKD	NO	NO	NO	68	Male	165	70	25.7	6.1	2.5	1.22	7.8	16.7	16.5	46.9	427	2.7	86.2	82	2015-08-13	2022-07-29	2542	No	No	No	0.775	-0.254892	0.0179	-4.02295	TA	TC	CC	GG	CC
CKD	NO	YES	YES	64	Male	161	61	23.5	6.1	1	3.05	35.6	33.7	14.1	43.7	596	6.7	39.8	162	2016-01-28	2022-07-29	2374	No	No	No	5.53	1.71019	0.851	-0.161343	TA	TC	CC	GG	CC
CKD	NO	NO	YES	54	Male	163	68	25.6	12.2	1	6.1	52.4	34.3	12.5	44.9	310	2.3	44.3	152	2015-10-27	2022-08-01	2470	No	Yes	Yes	0.467	-0.761426	0.0737	-2.60775	TG	TC	CC	GG	CC
CKD	NO	NO	YES	63	FeMale	165	85	31.2	4.6	1	2.3	24.6	23.1	14.9	41	453	4.4	62.3	85	2021-02-07	2022-08-04	543	No	Yes	Yes	1.21	0.19062	0.259	-1.35093	TT	TT	CC	GG	CC
CKD	NO	NO	NO	45	FeMale	158	54	21.6	4.9	1	2.45	11.1	16.3	13.2	47.6	428	3.2	53.4	103	2020-06-25	2022-08-04	770	No	Yes	Yes	1.63	0.48858	0.28	-1.27297	TT	TT	CC	GG	CC
CKD	NO	YES	NO	70	Male	172	59	19.9	3.3	0.5	3.3	8	7	4.1	42.5	150	5.1	11.2	477	2014-11-10	2022-08-05	2825	No	No	No	1.31	0.270027	0.17	-1.77196	TT	CC	TC	GG	TC
CKD	NO	YES	YES	57	Male	159	54	21.4	6.1	2	1.525	13.4	13	6	40.2	380	2.2	59.8	116	2021-02-03	2022-08-05	548	No	Yes	Yes	0.227	-1.48281	0.065	-2.73337	AA	CC	TC	GG	TC
CKD	NO	YES	YES	66	Male	168	69	24.4	4.1	2.5	0.82	5.6	10.9	14.7	42.3	611	2	55.9	120	2018-11-11	2022-08-09	1367	No	No	No	0.445	-0.809681	0.0286	-3.55435	TA	TC	TC	AG	TC
CKD	NO	NO	NO	53	Male	165	65	23.9	4.6	2	1.15	10.1	17.3	17.1	46.6	570	3	59.5	118	2019-11-26	2022-08-09	987	No	Yes	Yes	0.309	-1.17441	0.0163	-4.11659	TG	TC	TC	GG	TC
CKD	NO	YES	NO	72	Male	172	75	25.4	3.8	1.5	1.26667	86.7	60.4	23.6	42.3	311	5.9	86.4	81	2012-02-02	2022-08-11	3843	No	No	No	0.704	-0.350977	1.86	0.620576	TA	TC	TC	GG	TC
CKD	NO	NO	NO	43	Male	170	82	28.4	5.8	0.5	5.8	12.2	20.7	17.3	45.4	581	3.2	49	145	2019-01-07	2022-08-18	1319	No	No	No	1.33	0.285179	0.332	-1.10262	GG	CC	CC	GG	CC
CKD	NO	NO	NO	65	Male	175	59	19.3	3	1	1.5	68.7	104.5	7.6	39	446	3.6	73.4	95	2016-10-13	2022-08-18	2135	No	No	No	1.21	0.19062	0.00734	-4.91442	AA	TT	CC	GG	CC
CKD	NO	NO	NO	39	FeMale	148	43	19.6	6.4	2	1.6	8.4	20.2	12.5	44.5	488	2.2	68.7	85	2020-02-05	2022-08-23	930	No	Yes	Yes	1.07	0.067659	0.111	-2.19823	TT	TT	TC	GG	TC
CKD	NO	NO	NO	63	FeMale	156	48	19.7	4.4	1	2.2	11	20.7	15.8	47.6	372	1.6	83.4	66	2020-07-30	2022-08-25	756	No	No	No	0.978	-0.022246	0.295	-1.22078	GG	CC	CC	AG	CC
CKD	NO	NO	NO	54	Male	170	77	26.5	9.6	2	2.4	8.8	15.4	13	46.5	429	3.8	83.2	88	2020-04-21	2022-08-26	857	No	No	No	0.433	-0.837018	0.0224	-3.79869	TA	CC	CC	AG	CC
CKD	NO	NO	NO	57	FeMale	158	50	20	7.2	1.5	2.4	17.6	20.9	13.9	46.6	366	1.8	73.4	75	2020-11-26	2022-08-30	642	No	No	No	0.868	-0.141564	0.1	-2.30259	GG	CC	TC	GG	TC
CKD	NO	NO	NO	60	Male	178	60	18.9	6.2	2	1.55	14	19.8	14	46.3	394	3.8	54.3	125	2020-07-21	2022-09-01	772	No	No	No	1.39	0.329304	0.572	-0.558616	TA	TC	CC	GG	CC
CKD	NO	NO	NO	44	Male	177	90	28.7	5.4	2	1.35	9.1	15.1	33.9	49.3	480	2.6	67.8	109	2021-09-01	2022-09-02	366	No	No	No	0.591	-0.525939	0.187	-1.67665	GG	CC	CC	GG	CC
CKD	NO	NO	NO	62	Male	158	50	20	7	0.5	7	22.1	16	14.2	31.7	182	50.9	31.2	201	2020-01-01	2022-09-05	978	No	No	No	1.01	0.00995	0.0516	-2.96423	GG	CC	TC	GG	TC
CKD	NO	NO	NO	75	FeMale	153	52	22.2	3.7	1	1.85	11.2	16	13.4	42.1	353	2.7	42.4	115	2019-08-05	2022-09-05	1127	No	No	No	0.757	-0.278392	0.53	-0.634878	AG	CC	TC	GG	TC
CKD	YES	NO	NO	56	Male	170	53	18.3	4.2	1	2.1	41	36	10.3	39.8	421	1.7	57.2	121	2018-12-05	2022-09-06	1371	No	No	No	2.48	0.908259	0.583	-0.539568	AA	CC	CC	AA	CC
CKD	NO	NO	NO	60	Male	175	68	22.2	3.8	2	0.95	14.5	14.9	15	45.8	468	1.8	80.4	89	2021-03-07	2022-09-07	549	No	No	No	1.6	0.470004	0.593	-0.522561	AA	CC	TC	GG	TC
CKD	NO	NO	NO	51	Male	165	55	20.2	7.7	2	1.925	11.3	15	10.5	45.1	462	1.5	48.5	142	2020-08-04	2022-09-08	765	Yes	No	Yes	2	0.693147	0.578	-0.548181	TT	TC	CC	GG	CC
CKD	NO	NO	NO	36	Male	164	45	16.7	5.4	2	1.35	30.8	21.7	15.4	44.8	632	1.9	30.4	226	2020-09-01	2022-09-08	737	No	No	No	2.66	0.978326	1.43	0.357674	GG	CC	TC	GG	TC
CKD	NO	NO	NO	59	Male	175	58	18.9	3.7	3	0.616667	58.7	57.7	40.3	36	420	48.8	88.7	82	2017-07-15	2022-09-08	1881	No	No	No	0.417	-0.874669	0.0387	-3.25192	TG	TC	CC	GG	CC
CKD	NO	NO	NO	54	Male	177	80	25.5	9	2	2.25	15.3	23.1	19.3	44.8	490	2.4	72.6	99	2019-08-26	2022-09-09	1110	No	No	No	0.799	-0.224394	1.05	0.04879	GG	CC	TC	GG	TC
CKD	NO	NO	NO	52	FeMale	158	49	19.6	3.9	2	0.975	8.8	16.5	6.1	47.5	762	2.4	52.5	102	2020-11-10	2022-09-19	678	No	No	No	1.35	0.300105	0.137	-1.98777	TT	TC	TC	GG	TC
CKD	NO	NO	YES	52	Male	175	66	21.6	5.7	2	1.425	17.5	17.4	8.5	41.4	122	3.1	83.9	88	2018-07-16	2022-09-19	1526	No	No	No	0.497	-0.699165	0.281	-1.2694	GG	CC	CC	GG	CC
CKD	NO	NO	YES	58	Male	172	76	25.7	3.7	1.5	1.23333	13.3	18.5	10.3	48.4	663	1.9	67.6	104	2015-09-03	2022-09-22	2576	No	No	No	1.36	0.307485	0.316	-1.15201	TA	TC	TT	GG	TT
CKD	NO	NO	YES	54	Male	161	59	22.8	8.1	2	2.025	31.7	19.1	21.6	46.5	333	6.2	71	101	2020-01-12	2022-09-23	985	No	Yes	Yes	0.646	-0.436956	0.0449	-3.10332	TG	TC	CC	GG	CC
CKD	NO	NO	NO	50	FeMale	170	57	19.7	6	2	1.5	28.3	34.5	8.4	42.9	293	3.1	87.7	66	2019-02-12	2022-09-27	1323	No	No	No	0.522	-0.650088	0.552	-0.594207	GG	CC	CC	GG	CC
CKD	NO	NO	NO	56	Male	175	70	22.9	1.25	3	0.208333	18	17.7	12.1	44.9	378	4.3	33.4	193	2019-12-20	2022-09-29	1014	No	No	No	0.632	-0.458866	0.249	-1.3903	TG	TT	TC	GG	TC
CKD	NO	YES	NO	64	Male	168	65	22.9	4.9	0.5	4.9	67.1	64.2	99.4	35.7	117	3.7	73.6	95	2019-09-24	2022-10-08	1110	No	No	No	0.406	-0.901402	0.0793	-2.53452	GG	CC	CC	GG	CC
CKD	NO	NO	NO	56	Male	165	60	22	6.3	3	1.05	11	17.3	10.2	45	428	3.8	63.9	110	2021-05-13	2022-10-09	514	No	Yes	Yes	0.732	-0.311975	0.0408	-3.19907	TG	TC	TC	GG	TC
CKD	NO	NO	YES	66	FeMale	163	56	21.1	3.1	2.5	0.62	16	26.3	8	40.2	430	2.1	42.3	118	2016-09-30	2022-10-14	2205	No	No	No	0.994	-0.006018	0.706	-0.34814	TA	TC	TC	GG	TC
CKD	NO	YES	NO	55	Male	164	70	26	3.4	2	0.85	64.2	46.4	22.2	43.7	469	2.5	76.8	94	2019-03-04	2022-10-17	1323	No	No	No	2.19	0.783902	0.394	-0.931404	TA	TC	CC	GG	CC
CKD	NO	NO	NO	67	Male	165	60	22	6.1	2	1.525	9.5	18.1	11.2	46.1	323	3.8	71.2	97	2020-07-24	2022-10-20	818	No	No	No	1.42	0.350657	0.138	-1.9805	TA	TC	CC	GG	CC
CKD	NO	NO	NO	57	Male	174	80	26.4	8	1	4	15.7	15.9	10.6	43.1	552	2.3	83.4	87	2020-07-27	2022-10-25	820	No	Yes	Yes	1.54	0.431782	0.205	-1.58475	GG	CC	CC	GG	CC
CKD	NO	NO	NO	72	Male	173	65	21.7	4.5	2	1.125	25.1	23.2	16.8	44.9	285	2.9	50.5	129	2018-04-13	2022-11-07	1669	No	No	No	1.04	0.039221	0.302	-1.19733	TG	TC	CC	AG	CC
CKD	NO	NO	NO	62	FeMale	160	57	22.1	6.4	2	1.6	37.5	24.5	15.2	42	424	2.5	46.9	109	2019-06-23	2022-11-07	1233	No	No	No	1.72	0.542324	1.44	0.364643	TG	CC	CC	AA	CC
CKD	NO	NO	NO	57	Male	177	80	25.5	7.7	1.5	2.56667	13.2	26	19.6	45.6	506	2.5	64.3	109	2018-12-08	2022-11-09	1432	No	No	No	1.59	0.463734	1.19	0.173953	TG	TC	CC	GG	CC
CKD	NO	NO	NO	71	Male	170	75	26	2.9	1.5	0.966667	12.2	20.5	12.6	46	471	2	76.7	90	2019-04-19	2022-11-10	1301	No	No	No	0.741	-0.299755	0.253	-1.37437	TT	TT	TC	GG	TC
CKD	NO	NO	NO	59	FeMale	163	62	23.3	4.5	2	1.125	10.1	17.9	19.5	45	341	4.7	63.1	85	2019-12-24	2022-11-15	1057	No	No	No	1.51	0.41211	0.156	-1.8579	AA	TT	CC	GG	CC
CKD	NO	NO	NO	33	FeMale	162	62	23.6	2.9	2	0.725	15.7	21.3	9.2	42.2	367	1.2	84.7	73	2019-07-08	2022-11-18	1229	No	No	No	0.713	-0.338274	0.376	-0.978166	AG	CC	TC	GG	TC
CKD	NO	NO	NO	63	Male	170	70	24.2	1.25	0.5	1.25	24.1	29	5.9	40.3	557	6.5	59.2	115	2021-02-10	2022-11-18	646	No	No	No	2.9	1.06471	0.54	-0.616186	TA	TC	CC	GG	CC
CKD	NO	NO	NO	67	Male	165	68	25	3.9	3	0.65	13	24.1	17.5	46.3	321	1.7	72	96	2017-06-23	2022-11-21	1977	No	No	No	1.55	0.438255	0.465	-0.765718	GG	CC	CC	AG	CC
CKD	NO	NO	NO	53	FeMale	170	44	15.2	8.2	2	2.05	5.6	5.8	10.5	36.8	386	6.4	58.2	93	2021-03-01	2022-11-21	630	No	No	No	0.744	-0.295714	0.115	-2.16282	GG	CC	CC	AG	CC
CKD	NO	YES	NO	73	FeMale	162	60	22.9	1.25	3	0.208333	17.4	23	10.1	39.6	274	2	80.9	66	2015-05-02	2022-11-22	2761	No	No	No	0.523	-0.648174	0.643	-0.441611	TG	TC	CC	GG	CC
CKD	NO	NO	NO	64	FeMale	160	52	20.3	9.8	2	2.45	15.3	16.6	8.1	44.3	392	2.1	54.6	95	2021-05-13	2022-11-25	561	No	No	No	0.489	-0.715393	0.0376	-3.28075	TT	CC	CC	GG	CC
CKD	NO	NO	NO	50	FeMale	156	41	16.8	3	0.5	3	19.7	33.3	9.5	36.6	359	15.2	54.1	100	2019-01-06	2022-11-28	1422	No	No	No	3.32	1.19996	0.0038	-5.57275	TG	TC	TC	GG	TC
CKD	NO	NO	NO	67	Male	168	60	21.3	8.6	0.5	8.6	14.5	14.4	11.8	47.1	329	2.9	47.8	137	2013-10-19	2022-12-02	3331	No	No	No	1.17	0.157004	0.0457	-3.08566	TG	CC	TC	GG	CC
CKD	NO	NO	NO	70	FeMale	165	60	22	7.2	1.5	2.4	27.1	25.2	16.5	44.8	393	1.9	72.7	73	2015-10-19	2022-12-08	2607	No	No	No	1.19	0.173953	0.136	-1.9951	TG	TT	CC	AG	CC
CKD	NO	NO	NO	47	Male	168	74	26	5.5	0.5	5.5	20.4	26.1	11.9	47.4	371	3.1	66.9	109	2019-03-05	2023-04-13	1500	No	No	No	1.19	0.173953	0.326	-1.12086	TG	TT	TC	GG	TC
CKD	NO	NO	NO	50	Male	180	76	23.5	3.9	1	1.95	9.2	17.6	37.9	41.7	411	18	74.7	98	2018-04-08	2023-04-14	1832	No	No	No	0.748	-0.290352	0.375	-0.980829	TT	TT	CC	GG	CC
CKD	NO	NO	NO	61	Male	165	65	23.9	4.3	1.5	1.43333	23.3	16.6	21	47.3	401	3	85.4	84	2021-09-15	2022-09-13	363	No	No	No	1.45	0.371564	0.0952	-2.35178	TG	TC	CC	GG	CC
Normal	NO	NO	NO	32	Male	182	75	22.6	5.1	1	2.55	13.4	16.7	4	48.8	268	1.3	109.6	76	2018-10-13	2022-06-10	1336	No	Yes	Yes	2.83	1.04028	0.191	-1.65548	AG	CC	CC	AG	CC
Normal	NO	NO	NO	31	FeMale	162	50	19.1	3.2	1	1.6	10.3	16.1	18.5	40.4	273	0.8	187.8	37	2016-06-08	2022-06-14	2197	No	No	No	0.469	-0.757153	0.247	-1.39837	GG	CC	CC	GG	TC
Normal	NO	NO	NO	65	FeMale	155	49	20.4	3.9	1	1.95	15.4	19.8	13.2	43.8	429	2.5	96.2	58	2018-09-27	2022-06-16	1358	No	No	No	0.422	-0.86275	0.0404	-3.20893	GG	CC	TC	GG	TC
Normal	NO	NO	NO	58	Male	175	76	24.8	3.6	1	1.8	26.3	25.6	23.9	43.8	312	1.6	110.4	68	2016-05-18	2022-06-16	2220	No	No	No	0.431	-0.841647	0.1	-2.30259	TT	CC	CC	GG	CC
Normal	NO	NO	NO	54	FeMale	155	38	15.8	5.4	0.5	5.4	32.6	96.9	163.1	38.5	372	15.6	127.3	47	2020-06-28	2022-06-17	719	No	No	No	0.528	-0.638659	0.593	-0.522561	GG	CC	CC	AG	CC
Normal	NO	NO	NO	42	FeMale	151	58	25.2	8.1	1	4.05	18.6	26	12.5	43.4	236	2.1	152.6	42	2021-07-01	2022-06-30	364	No	No	No	0.163	-1.81401	0.22	-1.51413	AA	TT	CC	GG	CC
Normal	NO	NO	NO	39	FeMale	160	55	21.5	6.9	2	1.725	16.9	29.1	7.3	40.1	314	1	95.3	64	2019-03-07	2022-07-06	1217	No	No	No	1.13	0.122218	0.169	-1.77786	TT	TT	CC	AG	CC
Normal	NO	NO	NO	65	Male	168	65	23	4.3	2	1.075	12	17.6	13	45	389	3.1	90.8	79	2019-08-05	2022-07-07	1067	No	No	No	0.309	-1.17441	0.258	-1.3548	TG	TC	CC	GG	CC
Normal	NO	NO	NO	42	Male	176	75	24.2	6.2	2	1.55	40.8	25.3	12.6	46.3	400	5	115.9	69	2018-02-08	2022-07-07	1610	No	No	No	1.41	0.34359	0.83	-0.18633	TG	CC	CC	GG	CC
Normal	NO	NO	NO	29	Male	180	65	20.1	8.5	0.5	8.5	39.4	65.5	20.2	39.4	595	3.2	125	69	2020-12-31	2022-07-13	559	No	No	No	1.42	0.350657	0.0798	-2.52823	TA	CC	CC	GG	CC
Normal	NO	NO	NO	61	FeMale	156	36	14.8	5.9	1	2.95	24.1	32.1	11.5	39.4	315	3.4	118.4	49	2018-10-17	2022-07-13	1365	No	No	No	0.516	-0.661649	0.674	-0.394525	TT	TT	TC	GG	TT
Normal	NO	NO	NO	45	Male	165	65	23.9	5.8	2	1.45	16.6	18.5	19.6	45	485	1.9	102.3	76	2019-09-03	2022-07-18	1049	No	No	No	0.219	-1.51868	1.69	0.524729	TG	TC	TC	GG	TC
Normal	NO	NO	NO	34	Male	175	70	22.9	8.1	1	4.05	21.1	25.1	12.9	44.2	420	3.6	119	70	2019-07-20	2022-07-19	1095	No	No	No	0.252	-1.37833	0.0875	-2.43612	GG	CC	CC	AG	CC
Normal	NO	NO	NO	51	Male	171	72	24.6	3.6	3	0.6	17.7	24.8	16.2	46.8	351	0.4	102.8	74	2018-09-06	2022-07-21	1414	No	No	No	0.0402	-3.21389	0.00804	-4.82333	AG	CC	CC	AG	CC
Normal	NO	NO	NO	33	Male	179	67	20.9	5.4	2	1.35	21.4	24.6	17.6	46.6	349	3.9	107.3	77	2020-05-27	2022-07-21	785	No	No	No	0.221	-1.50959	0.043	-3.14656	TG	TC	TC	GG	TC
Normal	NO	NO	NO	37	FeMale	150	36	16	7.6	2	1.9	12.9	23.7	8.6	42.4	339	2.1	107.9	58	2020-07-29	2022-07-27	728	No	No	No	0.69	-0.371064	0.0227	-3.78539	TA	TC	CC	AG	CC
Normal	NO	NO	NO	32	Male	168	62	22	6.3	2	1.575	37.3	28.8	26.3	47	467	1.7	126.8	67	2021-05-01	2022-07-27	452	No	No	No	0.112	-2.18926	0.0266	-3.62684	GG	CC	CC	GG	CC
Normal	NO	NO	NO	58	Male	174	71	23.5	7.3	2	1.825	14.3	26.4	13.8	44.9	278	2.8	110.4	68	2021-01-18	2022-07-28	556	No	Yes	Yes	0.582	-0.541285	2.37	0.86289	GG	CC	CC	GG	CC
Normal	NO	NO	NO	62	Male	180	79	24.4	6.6	0.5	6.6	17.9	20.6	16.6	38.9	385	1.5	128.4	59	2018-12-07	2022-07-28	1329	No	No	No	0.114	-2.17156	1.15	0.139762	TG	TC	CC	GG	CC
Normal	NO	NO	NO	57	FeMale	170	53	18.2	4	2	1	44.5	41.3	20.3	43.8	354	3.4	105.1	55	2018-11-10	2022-08-03	1362	No	No	No	2.7	0.993252	0.315	-1.15518	TG	TC	TC	GG	TC
Normal	NO	NO	NO	33	Male	175	75	24.5	1.3	2	0.3125	17.4	22.3	11.6	49	302	0.6	114.1	73	2018-08-22	2022-08-04	1443	No	No	No	3.1	1.1314	0.675	-0.393043	TG	TC	TC	GG	TC
Normal	NO	NO	NO	58	FeMale	156	47	19.1	5.3	2	1.325	13.1	26.4	8.7	44.7	307	3	100.5	57	2019-09-05	2022-08-09	1069	No	No	No	0.421	-0.865122	0.169	-1.77786	TA	TC	TC	AG	TC
Normal	NO	NO	NO	56	Male	175	68	22.2	5.1	2	1.275	14.7	18.8	15.1	46.5	450	1.3	111.2	68	2020-08-14	2022-08-09	725	No	No	No	1.43	0.357674	1.02	0.019803	AA	TC	CC	GG	CC
Normal	NO	NO	NO	35	Male	177	57	18.2	5.3	2	1.325	50.9	28.1	17.4	48.3	471	2.3	150	57	2019-02-15	2022-08-12	1274	No	No	No	0.611	-0.492658	0.035	-3.35241	TG	TC	TC	GG	TC
Normal	NO	NO	NO	39	FeMale	162	55	21	7.3	4	0.9125	12	16	9.8	75	283	1.9	132.8	48	2019-12-21	2022-08-16	969	No	No	No	0.188	-1.67131	0.126	-2.07147	TG	CC	CC	AG	CC
Normal	NO	NO	NO	64	Male	175	58	18.8	4.6	2	1.15	10.5	16.7	13	45.2	392	2.1	91.1	79	2019-06-10	2022-08-19	1166	No	No	No	0.627	-0.466809	0.155	-1.86433	TA	CC	TC	AG	CC
Normal	NO	NO	NO	53	FeMale	162	59	22.5	5.1	1	2.55	22.9	39	20.1	36.6	338	2.5	131	46	2021-04-09	2022-08-22	500	No	No	No	0.115	-2.16282	0.0362	-3.3187	TG	TC	CC	AG	CC
Normal	NO	NO	NO	40	Male	173	70	23.4	1.3	1	0.625	16	21.8	19	44	356	2.2	108	74	2020-09-11	2022-08-24	712	No	No	No	0.631	-0.460449	0.0725	-2.62417	GG	CC	CC	AG	CC
Normal	NO	NO	NO	67	FeMale	157	65	26.4	3	2	0.75	11.4	14.6	13.9	43.9	322	2.5	93.7	59	2020-03-27	2022-08-24	880	No	Yes	Yes	2.01	0.698135	1.24	0.215111	TG	TC	TT	GG	TT
Normal	NO	NO	NO	33	Male	177	65	20.7	6.1	3	1.01667	27.3	31.1	17.6	40.9	260	4.2	158.2	55	2018-06-12	2022-08-24	1534	No	No	No	0.422	-0.86275	0.308	-1.17766	AG	CC	CC	GG	CC
Normal	NO	NO	NO	50	FeMale	155	58	24.1	4.7	0.5	4.7	46.6	41.9	15	44.5	196	2	129.3	47	2018-08-15	2022-08-25	1471	No	No	No	0.293	-1.22758	0.0405	-3.20645	GG	CC	CC	GG	CC
Normal	NO	NO	NO	20	FeMale	168	70	24.8	1.3	4	0.15625	27.8	20.5	9.1	42	387	6.8	115.3	61	2016-01-22	2022-08-26	2408	No	No	No	1.24	0.215111	0.0799	-2.52698	GG	CC	CC	GG	CC
Normal	NO	NO	NO	55	Male	175	72	23.5	5.4	2.5	1.08	20.1	21.2	10.5	45.3	281	1	126.5	61	2018-05-08	2022-08-30	1575	No	No	No	1.15	0.139762	0.0389	-3.24676	TA	TC	TC	GG	TC
Normal	NO	NO	NO	48	Male	165	53	19.5	3.7	2	0.925	15	21.2	17.7	43	439	9.1	135.2	59	2020-04-03	2022-08-31	880	No	No	No	0.337	-1.08767	0.167	-1.78976	TG	TC	CC	GG	CC
Normal	NO	NO	NO	51	Male	176	68	22	1.3	1.5	0.416667	11.4	14.9	10.1	44.2	338	1.4	113.4	68	2018-10-24	2022-09-01	1408	No	No	No	0.249	-1.3903	0.0922	-2.3838	TA	TC	CC	GG	CC
Normal	NO	NO	NO	45	Male	170	67	23.2	3	1	1.5	34	22.8	16.9	47.4	499	2	105.5	74	2016-04-29	2022-09-02	2317	No	No	No	0.496	-0.701179	0.0738	-2.6064	TG	TC	CC	GG	CC
Normal	NO	NO	NO	46	Male	169	70	24.5	1.3	0.5	1.25	12.7	16	11.8	45.5	265	5.9	147.9	55	2019-02-14	2022-09-05	1299	No	No	No	0.337	-1.08767	0.265	-1.32803	TT	TT	CC	GG	CC
Normal	NO	NO	NO	54	Male	176	82	26.5	6.8	2	1.7	13.7	20.5	17.7	43.9	282	3.1	110.2	69	2019-05-21	2022-09-06	1204	No	No	No	0.638	-0.449417	0.135	-2.00248	TT	TC	TC	GG	TC
Normal	NO	NO	NO	53	FeMale	161	54	20.8	3	0.5	3	58.7	68.2	21.4	43.4	338	2.2	134.4	45	2012-03-18	2022-09-07	3825	No	No	No	0.115	-2.16282	0.158	-1.84516	GG	TC	TC	GG	TC
Normal	NO	NO	NO	59	Male	169	69	24.2	3.2	1	1.6	36.1	44.8	26.1	33.2	362	28.9	113.9	66	2017-09-19	2022-09-15	1822	No	No	No	0.36	-1.02165	0.016	-4.13517	TG	TC	CC	GG	CC
Normal	NO	NO	NO	40	Male	167	66	23.7	7.1	2	1.775	15.5	13.5	36.3	48.8	542	2	103.2	77	2021-01-13	2022-09-19	614	No	No	No	0.205	-1.58475	0.0104	-4.56595	AG	CC	CC	GG	CC
Normal	NO	NO	NO	65	FeMale	163	60	22.6	2.9	1	1.45	10.4	18.3	11.6	49.3	359	4.8	96.2	58	2011-02-23	2022-09-20	4227	No	No	No	0.456	-0.785262	2.48	0.908259	TG	TC	CC	GG	CC
Normal	NO	NO	NO	58	FeMale	175	72	23.5	5.2	2	1.3	54.4	38.1	25.7	43.8	323	4.8	116.9	50	2018-11-10	2022-09-22	1412	No	No	No	0.282	-1.26585	0.0668	-2.70605	TG	TC	TC	GG	TC
Normal	NO	NO	NO	57	Male	170	73	25.3	6.4	0.5	6.4	15.6	17.5	14.2	45.6	397	2.9	114.7	66	2021-01-04	2022-09-28	632	No	No	No	0.254	-1.37042	0.129	-2.04794	TA	TC	CC	AG	CC
Normal	NO	NO	NO	59	FeMale	164	61	22.7	4.6	1.5	1.53333	11.5	14.5	12	43.4	312	2.4	98.1	58	2019-04-13	2022-10-10	1276	No	No	No	1.2	0.182322	0.121	-2.11196	TT	CC	TC	GG	TC
Normal	NO	NO	NO	38	Male	170	70	24.2	1.3	2	0.3125	32.8	23.8	14.9	45.2	514	1.2	98.3	81	2021-09-06	2022-10-11	400	No	No	No	1.34	0.29267	0.344	-1.06711	GG	CC	TC	GG	TC
Normal	NO	NO	NO	41	Male	180	78	24.1	5	1	2.5	15.5	20.5	19.6	46.7	309	0.3	112.7	71	2018-06-11	2022-10-14	1586	No	No	No	0.224	-1.49611	0.369	-0.996959	TG	TC	CC	GG	CC
Normal	NO	NO	NO	54	Male	170	70	24.2	3.2	1	1.6	15.9	19.5	7.2	43.3	453	3.7	116	66	2012-04-18	2022-10-27	3844	No	No	No	0.857	-0.154317	0.539	-0.61804	TG	TC	CC	GG	CC
Normal	NO	NO	NO	52	Male	169	71	24.9	5.7	2	1.425	12.8	17.6	11.6	36.3	320	44.9	177.3	46	2017-06-13	2022-10-28	1963	No	No	No	0.831	-0.185125	0.0565	-2.87351	AA	TT	TC	GG	TC
Normal	NO	NO	NO	64	FeMale	158	60	24	3.8	2	0.95	24.4	21.7	8.9	42	416	6.2	120.1	48	2008-07-06	2022-11-09	5239	No	No	No	0.107	-2.23493	0.0409	-3.19663	GG	CC	CC	AG	TC
Normal	NO	NO	NO	50	Male	163	65	24.5	5.3	2.5	1.06	49.4	31.7	15.5	42.7	357	4.4	106.6	72	2016-05-13	2022-11-21	2383	No	No	No	0.822	-0.196015	0.215	-1.53712	TG	TC	TC	AG	TC
Normal	NO	NO	NO	50	FeMale	156	55	22.6	6.3	1	3.15	50.4	54.9	30.7	41	308	2.7	143.3	43	2015-06-19	2022-11-30	2721	No	No	No	0.253	-1.37437	0.0369	-3.29954	TG	TC	CC	GG	CC
